# Supplementary figures and images for: A Novel Polymerase Chain Reaction Assay for the Detection of Seven Mycoplasma Species of Cattle Origin
Source: Research Square preprint supplement (doi:10.21203/rs.3.rs-551853/v1), 2021-06-21

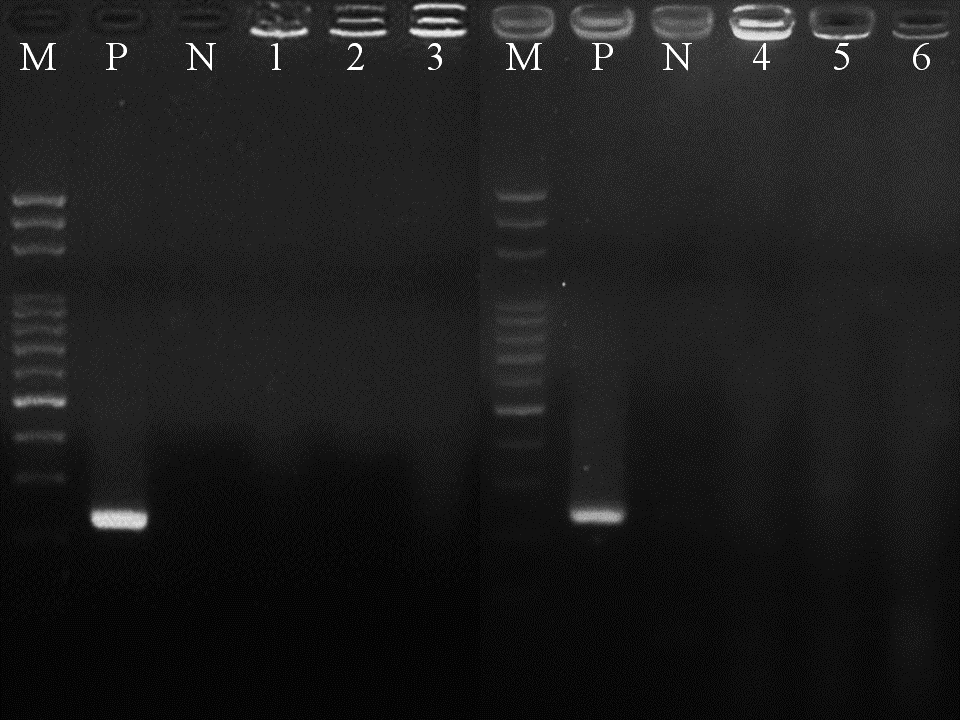

Supplement: Supplementary file 1 [file ac32cab8f90760f4c59b7467.docx]
